# Supplementary material for: Identifying Dynamic Functional Connectivity Changes in Dementia with Lewy Bodies Based on Product Hidden Markov Models
Source: PubMed Central journal article supplement (PMC4918689; doi:10.3389/fncom.2016.00060), 2016-06-23
Supplement: Presentation1.pdf [file Presentation1.pdf]

## Supplementary Material: Identifying dynamic functional connectivity changes in dementia with Lewy bodies based on product hidden Markov models

Marion Sourty<sup>1,\*</sup>, Laurent Thoraval<sup>1</sup>, Daniel Roquet<sup>1</sup>, Jean-Paul Armspach<sup>1</sup>, Jack Foucher<sup>1,2</sup> and Frédéric Blanc<sup>1,3</sup>

\*Correspondence:  
Marion Sourty  
marion.sourty@icube.unistra.fr

### 1 SUPPLEMENTARY TABLE

**Table S1.** Demographic table: mild-DLB, dementia with Lewy bodies at the stage of dementia; HC, healthy controls. MMSE: mini mental state examination. std: standard deviation.

| Characteristic                          | mild-DLB      | HC           |
|-----------------------------------------|---------------|--------------|
| Participants                            | 16            | 20           |
| Female                                  | 8             | 11           |
| Age, years (std)                        | 74.7 (10.2) * | 64.4 (8.6)   |
| MMSE score (std) (max 30)               | 20.8 (3.2)    | 29.0 (1.0)   |
| Education, years (std)                  | 7.9 (3.0)     | 13.6 (2.5) * |
| Participants with visual hallucinations | 9             | 0            |
| Participants with fluctuations          | 8             | 0            |
| Participants with parkinsonism          | 10            | 0            |

\*,  $p < 0.01$ , compared to HC resulting from two sample t-tests.

**Table S2.**  $p$ -value of the t-tests for each RSN and number of generated observations.  $h = 1$  indicates significant difference between DFC models of patients vs. controls ( $p < 0.01$ ).

| len. gen. \ RSN | OPFN                          | MON                           | RFPN                          | LFPN  | OPN   | FN    | CN    |
|-----------------|-------------------------------|-------------------------------|-------------------------------|-------|-------|-------|-------|
| 150             | <b><math>2.10^{-4}</math></b> | <b><math>1.10^{-8}</math></b> | <b><math>1.10^{-4}</math></b> | 0.012 | 0.657 | 0.606 | 0.065 |
| 300             | <b>0.004</b>                  | <b><math>1.10^{-7}</math></b> | <b><math>3.10^{-4}</math></b> | 0.172 | 0.426 | 0.763 | 0.426 |
| h               | <b>1</b>                      | <b>1</b>                      | <b>1</b>                      | 0     | 0     | 0     | 0     |

DMN: default mode network; LFPN: left fronto-parietal network; RFPN: right fronto-parietal network; OPFN: occipito-parieto-frontal network; OPN: occipital posterior network; MON: medial occipital network; BG: basal ganglia

## 2 SUPPLEMENTARY FIGURES

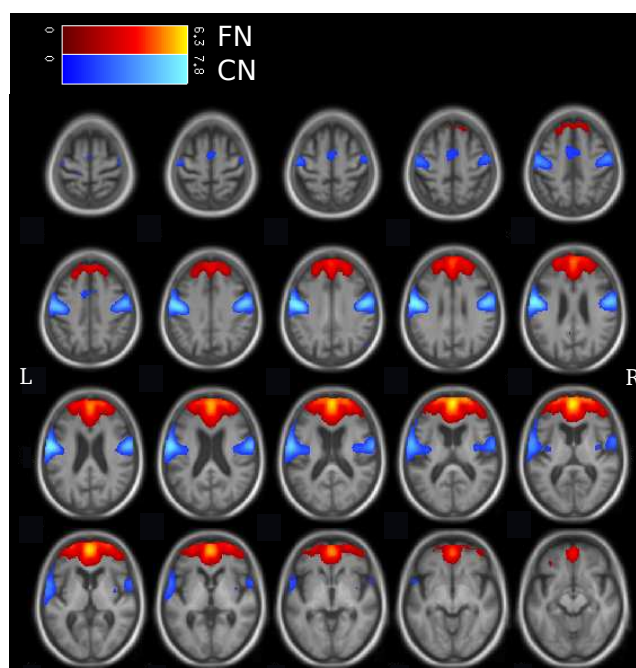

**Figure S1.** Spatial maps of the RSNs studied for the complementary analysis presented Table S2. Extracted from group-ICA expressed in z-score, plotted upon mean T1 from all subjects (patients and controls combined). (CN: central network; FN: frontal network).

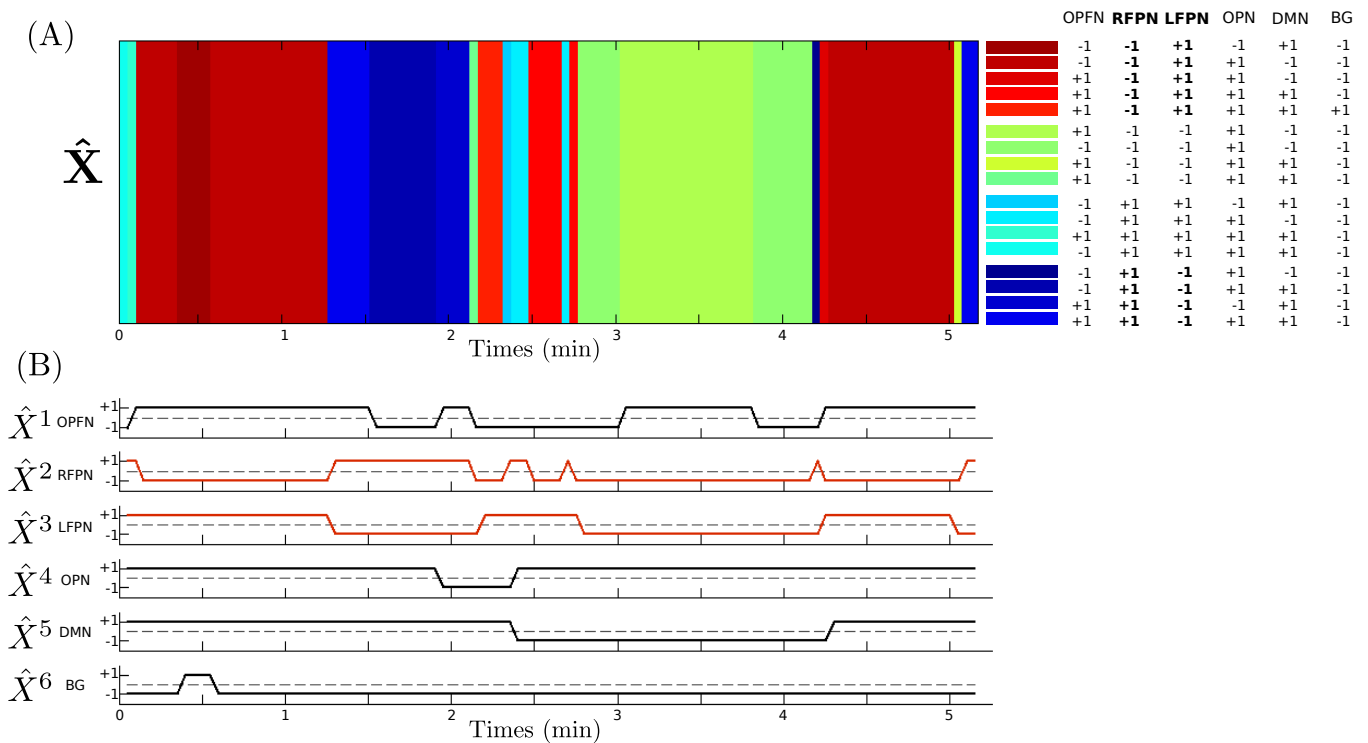

**Figure S2.** Decoded sequences  $\hat{X}$  and  $\hat{X}^k$  of PHMM<sub>MON</sub> for patient 1. In (A), the states are classified by colors: red tones for the states with LFPN “correlated” and the RFPN “anti-correlated” with the MON; blue tones for the states with LFPN “anti-correlated” and the RFPN “correlated” with the MON. (B) depicts the decoded sequences of each correlation between an RSN and the MON. (DMN: default mode network; LFPN: left fronto-parietal network; RFPN: right fronto-parietal network; OPFN: occipito-parieto-frontal network; OPN: occipital posterior network; MON: medial occipital network; BG: basal ganglia).

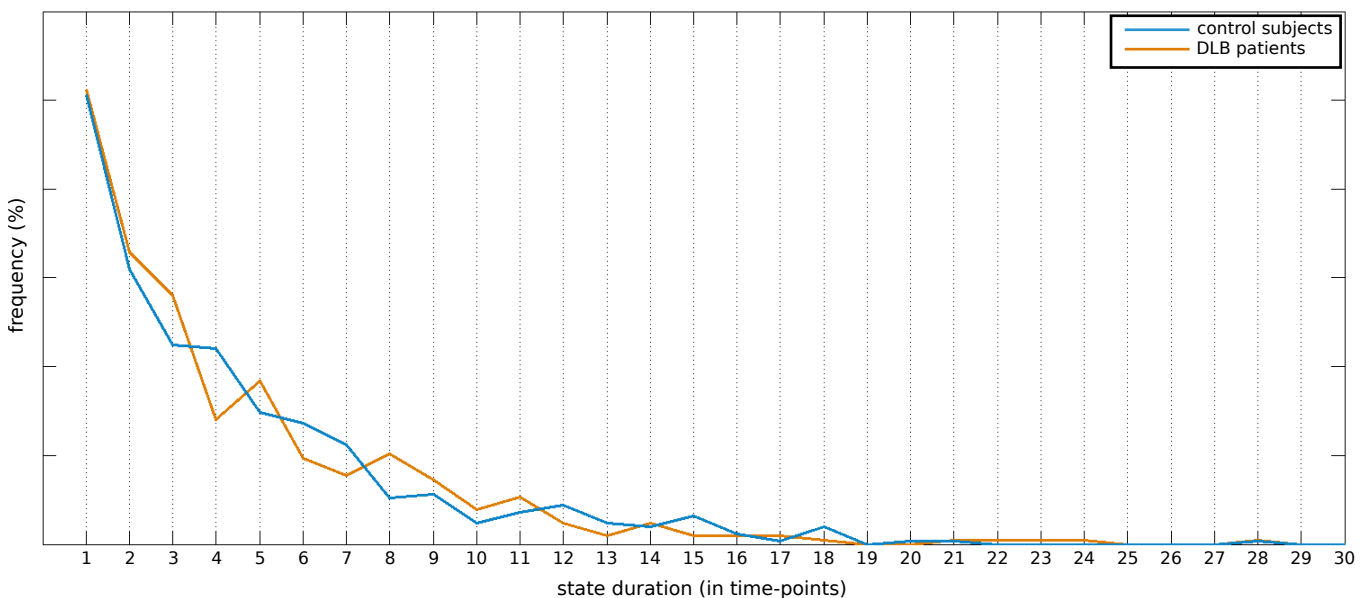

**Figure S3.** Distribution of the state duration in sequences  $\hat{X}_{MON}$  for DLB patients and control subjects, in time points (TR = 3 seconds). (MON: Median Occipital Network).

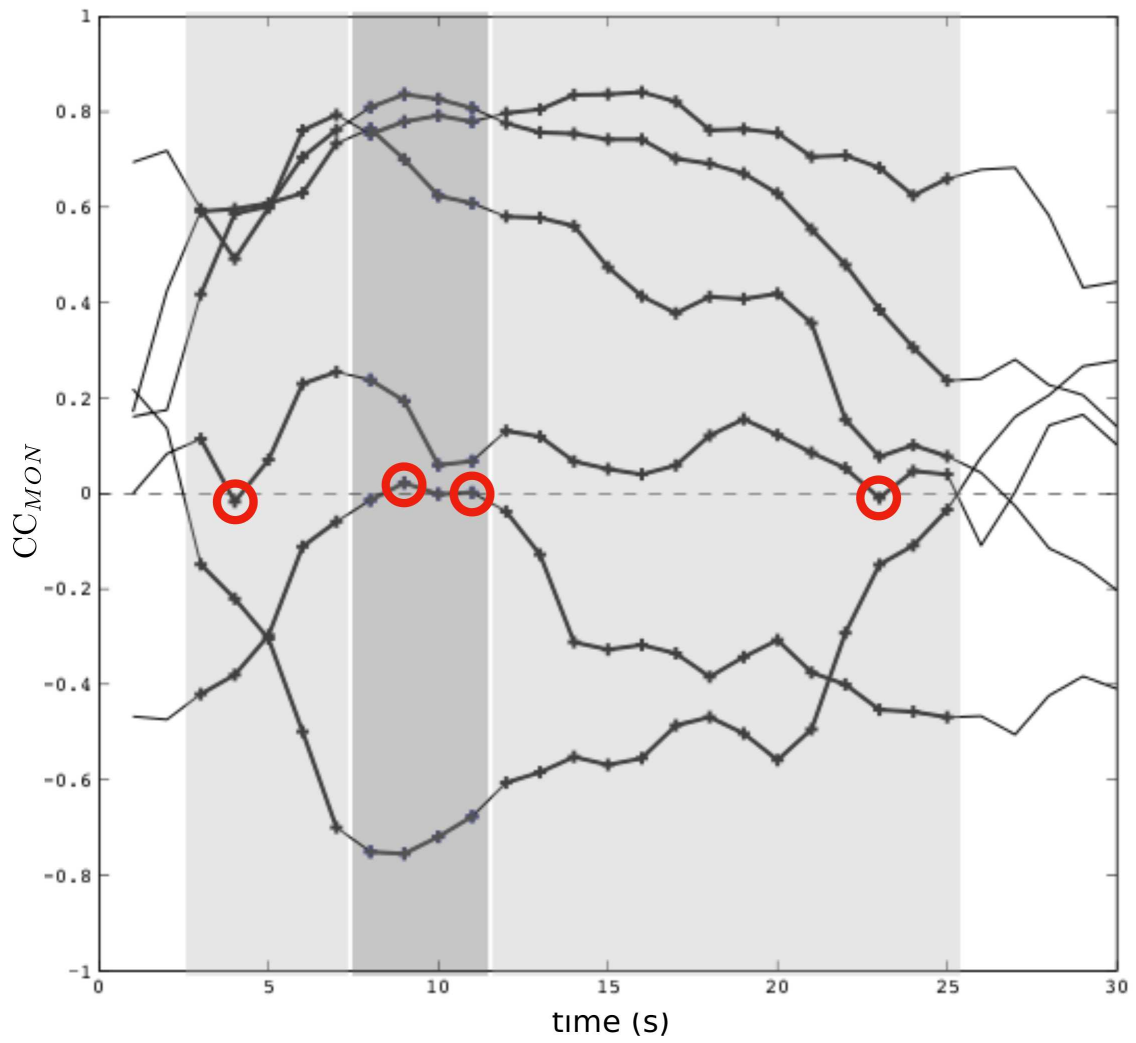

**Figure S4.** Distribution of the states for the 25 first seconds of the sequence, reported on the  $CC_{MON}$  for patient #1. This is a zoom on the Figure 4.(C).
